# Supplementary material for: IpsA, a novel LacI-type regulator, is required for inositol-derived lipid formation in Corynebacteria and Mycobacteria
Source: PubMed Central journal article supplement (PMC3899939; doi:10.1186/1741-7007-11-122), 2013-12-30
Supplement: 1741-7007-11-122-S1.pdf [file 1741-7007-11-122-S1.pdf]

# Supplemental Material

## to

### “IpsA, a novel lacI-type regulator, is required for inositol-derived lipid formation in Corynebacteria and Mycobacteria”, by Meike Baumgart et al

#### Supplemental methods

**Growth experiments.** For growth experiments, 5 ml of brain heart infusion broth (BHI, Difco Laboratories, Detroit, MI, USA) was inoculated with a colony from a fresh BHI agar plate and incubated for 6-8 h at 30°C and 220 rpm. Cells from this preculture were washed once in phosphate buffered saline (PBS, 137 mM NaCl, 2.7 mM KCl, 4.3 mM Na<sub>2</sub>HPO<sub>4</sub>, 1.4 mM KH<sub>2</sub>PO<sub>4</sub>, pH 7.3) and used to inoculate a second preculture, consisting of 20 ml CGXII minimal medium [1] supplemented with 3,4-dihydroxybenzoate (30 mg l<sup>-1</sup>) as an iron chelator and 2 % (w v<sup>-1</sup>) glucose as a carbon source, to an OD<sub>600</sub> of about 1. For sequential cultivations, cells from the stationary phase were diluted in fresh medium to a starting OD<sub>600</sub> of 1. After overnight incubation at 30°C and 120 rpm the main cultures were inoculated to an OD<sub>600</sub> of about 1 and incubated at 30°C and 1200 rpm in a Biolector (m2p-labs, Baesweiler, Germany) in 48-well FlowerPlates containing 750 µl CGXII minimal medium and different carbon sources, as specified in the text. For induction of the expression of genes under the control of the P<sub>tac</sub>-promoter, isopropyl β-D-1-thiogalactopyranoside (IPTG) was used at the concentrations specified. Where appropriate, the medium was supplemented with 25 µg l<sup>-1</sup> Kanamycin.

#### Recombinant DNA work

For the construction of the deletion plasmid, the up- and downstream regions (~500 bp) of *ipsA* were amplified using the oligonucleotide pairs Delta\_cg2910\_1(XmaI)/Delta\_cg2910\_2 and Delta\_cg2910\_3/Delta\_cg2910\_4(XbaI), respectively. The resulting PCR products served as templates for overlap extension PCR using the oligonucleotide pair Delta\_cg2910\_1(XmaI)/Delta\_cg2910\_4(XbaI). The resulting DNA fragment was digested with XmaI and XbaI and cloned into pK19*mobsacB*. Transfer of the sequenced plasmid pK19*mobsacB*-Δ*ipsA* into *C. glutamicum* and screening for the first and second recombination event were performed as described [2]. Kanamycin-sensitive and sucrose-resistant clones were tested by colony PCR analysis with the oligonucleotide pair Delta\_cg2910\_for/Delta\_cg2910\_rev for the deletion of cg2910.

For the construction of pET-TEV-*ipsA*, pAN6-*ipsA* and pAN6-*ipsA*-STREP, the *ipsA*-coding region was amplified using the primer pairs cg2910-NdeI-fw/cg2910-EcoRI-rv (for pET-TEV-*ipsA* and pAN6-*ipsA*) and cg2910-NdeI-fw/cg2910-NheI-rv-nostop (for pAN6-*ipsA*-STREP) and chromosomal DNA of *C. glutamicum* as template. The PCR products were cut with the enzymes given in the oligoname and ligated into pET-TEV and pAN6 cut with the same enzymes.

For plasmid pAN6-cg3323, the cg3323 coding region was amplified using the primer pair cg3323-NdeI-fw/cg3323-NheI-rv and chromosomal DNA of *C. glutamicum* as template. The PCR product was cut with the enzymes given in the oligoname and ligated into pAN6 cut with the same enzymes.

For plasmid pJC1-venus-term, the venus coding region was amplified using the primer pair eYFP-Bam-NdeI-fw/Venus-term2-rv and plasmid DNA of pXVENC-2 as template. The terminator-encoding region was amplified using the primer pair Venus-term3-fw/Term4-SalI-

rv and plasmid DNA of pAN6 as template. The fragments were joined by overlap extension PCR, cut with BamHI and SalI and ligated into pJC1 cut with the same enzymes.

For plasmid pJC1-Pcg3323-eYFP, the promoter region of cg3323 was amplified using the primer pair Promcg3323-rv-YFP/Promcg3323-fw-BamHI and chromosomal DNA of *C. glutamicum* as template. The *eyfp*-coding sequence was amplified using the primer pair eYFP-SpeI-rv/eYFP-fw and plasmid DNA of pEKEx2-eyfp as template. The fragments were joined by overlap extension PCR, cut with BamHI and SpeI and ligated into pJC1-venus-term cut with the same enzymes. The SpeI site is located between *venus* and the terminator, therefore *venus* is removed from the plasmid and only the *eyfp* reporter is used.

**Table S1: Strains and plasmids used in this study**

| Strain or plasmid                                     | Relevant characteristics                                                                                                                                                                                                                                                                                                 | Source or Reference |
|-------------------------------------------------------|--------------------------------------------------------------------------------------------------------------------------------------------------------------------------------------------------------------------------------------------------------------------------------------------------------------------------|---------------------|
| <b><i>M. tuberculosis</i></b>                         |                                                                                                                                                                                                                                                                                                                          |                     |
| H37Rv                                                 | wild-type laboratory strain, DNA used as PCR template                                                                                                                                                                                                                                                                    | ATCC 25618          |
| <b><i>C. diphtheriae</i></b>                          |                                                                                                                                                                                                                                                                                                                          |                     |
| ATCC 27010                                            | wild-type laboratory strain, DNA used as PCR template                                                                                                                                                                                                                                                                    | DSM 44123           |
| <b><i>E. coli</i></b>                                 |                                                                                                                                                                                                                                                                                                                          |                     |
| DH5 $\alpha$                                          | F <sup>-</sup> $\Phi$ 80 <i>dlac</i> $\Delta$ ( <i>lacZ</i> )M15 $\Delta$ ( <i>lacZYA-argF</i> ) U169 <i>endA1 recA1 hsdR17</i> ( <i>r<sub>K</sub><sup>-</sup></i> , <i>m<sub>K</sub><sup>+</sup></i> ) <i>deoR thi-1 phoA supE44 <math>\lambda</math><sup>-</sup> gyrA96 relA1</i> ; strain used for cloning procedures | [3]                 |
| BL21(DE3)                                             | F <sup>-</sup> <i>ompT hsdS<sub>B</sub></i> ( <i>r<sub>B</sub><sup>-</sup></i> , <i>m<sub>B</sub><sup>-</sup></i> ) <i>gal dcm</i> (DE3); host for protein production                                                                                                                                                    | [4]                 |
| <b><i>C. glutamicum</i></b>                           |                                                                                                                                                                                                                                                                                                                          |                     |
| ATCC13032                                             | Biotin-auxotrophic wild type                                                                                                                                                                                                                                                                                             | [5]                 |
| ATCC13032 $\Delta$ <i>ipsA</i>                        | ATCC13032 with an in-frame deletion of <i>cg2910</i>                                                                                                                                                                                                                                                                     | This work           |
| ATCC13032::pK18int                                    |                                                                                                                                                                                                                                                                                                                          | This work           |
| ATCC13032 $\Delta$ <i>ipsA</i> ::pK18int              |                                                                                                                                                                                                                                                                                                                          | This work           |
| ATCC13032::pK18int- <i>ipsA</i>                       |                                                                                                                                                                                                                                                                                                                          | This work           |
| ATCC13032 $\Delta$ <i>ipsA</i> ::pK18int- <i>ipsA</i> |                                                                                                                                                                                                                                                                                                                          | This work           |
| ATCC13032 $\Delta$ <i>mshC</i>                        | ATCC13032 with a deletion of <i>cg1709</i> , defect in mycothiol biosynthesis                                                                                                                                                                                                                                            | [6]                 |
| <b>Plasmids</b>                                       |                                                                                                                                                                                                                                                                                                                          |                     |
| pK19 <i>mobsacB</i>                                   | Kan <sup>R</sup> ; plasmid for allelic exchange in <i>C. glutamicum</i> ; (pK18 <i>oriV<sub>E.c.</sub></i> , <i>sacB</i> , <i>lacZ<math>\alpha</math></i> )                                                                                                                                                              | [7]                 |
| pK19 <i>mobsacB</i> - $\Delta$ <i>ipsA</i>            | Kan <sup>R</sup> ; pK19 <i>mobsacB</i> derivative containing a PCR product covering the up- and downstream regions of <i>ipsA</i> ( <i>cg2910</i> )                                                                                                                                                                      | This work           |
| pK18-int1                                             | Kan <sup>R</sup> ; plasmid for integration of foreign DNA into the intergenic region between <i>cg1121-cg1122</i> ( <i>oriV<sub>E.c.</sub></i> , <i>sacB</i> , <i>lacZ<math>\alpha</math></i> )                                                                                                                          | [8]                 |
| pK18int- <i>ipsA</i>                                  | Kan <sup>R</sup> ; plasmid for integration of the <i>ipsA</i> encoding region including the native promoter into the intergenic region between <i>cg1121-cg1122</i>                                                                                                                                                      | This work           |
| pEKEx2-eyfp                                           | Kan <sup>R</sup> ; pEKEx2 containing <i>eyfp</i> with artificial RBS, under control of P <sub><i>tac</i></sub>                                                                                                                                                                                                           | [9]                 |
| pAN6                                                  | Kan <sup>R</sup> ; <i>C. glutamicum</i> / <i>E. coli</i> shuttle vector for regulated gene expression, derivative of pEKEx2                                                                                                                                                                                              | [10]                |
| pAN6- <i>ipsA</i>                                     | Kan <sup>R</sup> ; pAN6-derivative for expression of <i>IpsA</i> under control of the P <sub><i>tac</i></sub> promoter                                                                                                                                                                                                   | This work           |
| pAN6- <i>ipsA</i> -STREP                              | Kan <sup>R</sup> ; pAN6-derivative for overproduction of <i>IpsA</i> with a C-terminal STREP-tag under control of the P <sub><i>tac</i></sub> promoter                                                                                                                                                                   | This work           |
| pAN6-rv3575c                                          | Kan <sup>R</sup> ; pAN6-derivative for expression of <i>rv3575</i> ( <i>IpsA</i> homolog from <i>M. tuberculosis</i> ) under control of the P <sub><i>tac</i></sub> promoter                                                                                                                                             | This work           |
| pAN6-DIP1969                                          | Kan <sup>R</sup> ; pAN6-derivative for expression of DIP1969 ( <i>IpsA</i> homolog from <i>C. diphtheriae</i> ) under control of the P <sub><i>tac</i></sub> promoter                                                                                                                                                    | This work           |
| pAN6-cg3323                                           | Kan <sup>R</sup> ; pAN6-derivative for expression of <i>ino1</i> under control of the P <sub><i>tac</i></sub> promoter                                                                                                                                                                                                   | This work           |
| pET-TEV                                               | Kan <sup>R</sup> ; pET28b derivative for overexpression of genes in <i>E. coli</i> , adding an N-terminal decahistidine tag and a TEV protease cleavage site to the target protein (pBR322 <i>oriV<sub>E.c.</sub></i> , PT7, <i>lacI</i> )                                                                               | [11]                |
| pET-TEV- <i>ipsA</i>                                  | Kan <sup>R</sup> ; pET-TEV derivative for overproduction of <i>IpsA</i>                                                                                                                                                                                                                                                  | This work           |

---

|                   |                                                                                                                                                                                |           |
|-------------------|--------------------------------------------------------------------------------------------------------------------------------------------------------------------------------|-----------|
| pJC1              | with an N-terminal decahistidine tag which can be cleaved off using TEV protease<br>Kan <sup>R</sup> , Amp <sup>R</sup> ; <i>C. glutamicum</i> / <i>E. coli</i> shuttle vector | [12]      |
| pXVENC-2          | Kan <sup>R</sup> , <i>oriT oriV</i> , P <sub>xyI</sub> , <i>venus</i>                                                                                                          | [13]      |
| pJC1-venus-term   | Kan <sup>R</sup> , pJC1 derivative carrying the venus coding sequence and additional terminators.                                                                              | This work |
| pJC1-Pcg3323-eYFP | Kan <sup>R</sup> ; pJC1-venus-term derivative carrying the promoter of <i>ino1</i> (cg3323) fused to <i>eyfp</i> for promoter activity studies.                                | This work |

---

**Table S2: Oligonucleotides used in this study**

| Oligonucleotide                                                                                                                 | Sequence (5' → 3') and properties <sup>a</sup>            |
|---------------------------------------------------------------------------------------------------------------------------------|-----------------------------------------------------------|
| <b>Deletion of <i>ipsA</i> (cg2910) and PCR-analysis of the resulting mutants</b>                                               |                                                           |
| Delta_cg2910_1(Xmal)                                                                                                            | TATATACCCGGGAATGCGTGGATGATGCGATCATC                       |
| Delta_cg2910_2                                                                                                                  | <b>CCCATCCACTAAACTTAAACAT</b> TGTTTCCTACCCATAATCATTTTC    |
| Delta_cg2910_3                                                                                                                  | <b>TGTTTAAGTTTAGTGGATGGGG</b> GTTCCACGGTTGCGCCAATCTAG     |
| Delta_cg2910_4(Xbal)                                                                                                            | TATATATCTAGAATTTCGTGGAGATCAAGCCTTTCC                      |
| Delta_cg2910_for                                                                                                                | GTGATCATCATGCTCGCTGTGG                                    |
| Delta_cg2910_rev                                                                                                                | GCCAAGATTGAAGCAGATCTGG                                    |
| <b>Construction of <i>IpsA</i> expression plasmid</b>                                                                           |                                                           |
| cg2910-NdeI-fw                                                                                                                  | GCGCCATATGATTATGGGTAGGAAACAACAATAC                        |
| cg2910-Nhe-rv-nostop                                                                                                            | GCGCGCTAGCGATTGGCGCAACCGTGGAACC                           |
| cg2910-EcoRI-rv                                                                                                                 | GCGCGAATTCCTAGATTGGCGCAACCGTGGAACC                        |
| <b>Construction and PCR-verification of the chromosomal complementation with <i>ipsA</i></b>                                    |                                                           |
| cg2910+Prom-MfeI-fw                                                                                                             | GCGCCAATTGAATTGGATCCGGCAGCGTTG                            |
| cg2910+Prom-XhoI-rv                                                                                                             | GCGCGCTCGAGCTAGATTGGCGCAACCGTGGA                          |
| pK18-IgR-fw                                                                                                                     | CTTGGTTCGAATATGCAGTTCCGG                                  |
| cg2911-fw                                                                                                                       | ATCACCTTGGCAACGGAG                                        |
| int-reg-fw                                                                                                                      | AGCACCTTCGGCAAGAAGTA                                      |
| int-reg-rv                                                                                                                      | CATCGAAGGTGTGCGAAAC                                       |
| M13-rv                                                                                                                          | AGCGGATAACAATTTACACAGGA                                   |
| <b>Construction of pAN6-cg3323</b>                                                                                              |                                                           |
| cg3323-NdeI-fw                                                                                                                  | GCGCCATATGAGCACGTCCACCATCAG                               |
| cg3323-NheI-rv                                                                                                                  | GCGCGCTAGCTTACGCCTCGATGATGAATGCC                          |
| <b>Construction of pJC1-venus-term</b>                                                                                          |                                                           |
| eYFP-Bam-NdeI-fw                                                                                                                | CGCGGATCCGCGGATATCCCATATGGTGAGCAAGGGCGAGGAGCTG            |
| Venus-term2-rv                                                                                                                  | <b>AAAACGACGGCCAGTACTAGTTTACTTGTACAGCTCGTCCATGC</b>       |
| Venus-term3-fw                                                                                                                  | <b>GAGCTGTACAAGTAACTAGTACTGGCCGTCGTTTT</b>                |
| Term4-SalI-rv                                                                                                                   | ACGCGTTCGACCAAAAAGAGTTTGTAGAAACGCAA                       |
| <b>Construction of the cg3323 promoter fusion plasmid pJC1-Pcg3323-eYFP</b>                                                     |                                                           |
| Promcg3323-rv-YFP                                                                                                               | <b>CTCGCCCTTGCTCACCAT</b> CTAAAATTTCTCCTCTTAAAAAGATAACGGC |
| Promcg3323-fw-BamHI                                                                                                             | GCGCGGATCCGGAAATCTCCCGAACATCAGAAG                         |
| eYFP-SpeI-rv                                                                                                                    | GGACTAGTTTATCTAGACTTGTACAGCTCGTCCATG                      |
| eYFP-fw                                                                                                                         | ATGGTGAGCAAGGGCGAGGAG                                     |
| <b>Oligonucleotides for the expression plasmids of <i>IpsA</i> homologs of <i>M. tuberculosis</i> and <i>C. diphtheriae</i></b> |                                                           |
| DIP1969-NdeI-fw                                                                                                                 | GCGCCATATGGTGGTGCCTATGGCTTCC                              |
| DIP1969-NheI-rv                                                                                                                 | GCGCGCTAGCCTAGCCTCGCCGATGCTC                              |
| Rv3575c-NdeI-fw                                                                                                                 | GCGCCATATGAGTCCCACACCGCGGAGG                              |
| Rv3575c-NheI-rv                                                                                                                 | GCGCGCTAGCCTTACGCCGGCGGACCCGC                             |
| <b>PCR products used in gel shift assays (~500 bp fragments)</b>                                                                |                                                           |
| cg0044-fw                                                                                                                       | GCAGATTGCAACATCGTGGAC                                     |
| cg0044-rv                                                                                                                       | GATTAACAGCGCAGCACCAATG                                    |
| cg0043-fw                                                                                                                       | TAGTGATGCCGTGGCTACTC                                      |
| cg0043-rv                                                                                                                       | GCGATTTCTGGCACAAGGTTG                                     |

|           |                           |
|-----------|---------------------------|
| cg0326-fw | GCTTCGATAAGCTCCTGGTTG     |
| cg0326-rv | CAAGGCAAACCTTGACGTCGAC    |
| cg0404-fw | CGCAATAAGTTTCGCCTTACAGG   |
| cg0404-rv | GGAGCTTCATCGGTGTATTTGC    |
| cg0508-fw | CGACCACCCTCTCAACAGGTG     |
| cg0508-rv | GAGTGCAAAAACAGTAACGGCAG   |
| cg3405-fw | TCGATTTACCGCTGTGCGAG      |
| cg3405-rv | CTTGAATACGAACCTGACCTGG    |
| cg2911-fw | ATCACCTTGGCAACGGAG        |
| cg2911-rv | CAGTTGAGCAGCCAGCTAG       |
| cg3323-fw | GGAAATCTCCCGAACATCAGAAG   |
| cg3323-rv | AATGGCAACCCTGATGGTGG      |
| cg3195-fw | TCGTCACATGGTGGTTTCTAC     |
| cg3195-rv | GGCCAAGGTGGTTAAGTCTTG     |
| cg0623-fw | ACTGCTGAGGTAACCCCTGAG     |
| cg0623-rv | CACAACCAGCAATACCCAACG     |
| cg2896-fw | CGTTCTACGCAATCGCTGTAG     |
| cg2896-rv | AAGCCGTCACCACGGCGGTAA     |
| cg0625-fw | GTCGCAGGAGATAACGAAGC      |
| cg0625-rv | CACGGTTGCAGCAGACCA        |
| cg2870-fw | AACCGGTGGAGAATTCCTTCTG    |
| cg2870-rv | TTGACCTCAACACTTGAAGATTCTG |
| cg1421-fw | CGTTATTGCTGGCGAAGGC       |
| cg1421-rv | GATTGCGGTGCCCATGTTG       |
| cg1055-fw | ATCATCCGAACCAGGGAAACG     |
| cg1055-rv | AGGTCTGCGGTGGCAATG        |
| cg0727-fw | GAAGCATTGGAAACTACTTTAGCGC |
| cg0727-rv | CTCTTGGGTCTTTAGTGAATCGAG  |
| cg3389-fw | GAGCTATTCCAACACTTGGACG    |
| cg3389-rv | CGGGTGGGTGATGCCTAG        |
| cg0534-fw | GCTGGTGGTGCGTTATGATTC     |
| cg0534-rv | CAAAGAGGATACGTGCGATG      |
| cg2181-fw | CACGCGAATTAACGCTTATCGAC   |
| cg2181-rv | GGTTACAGCGAGAGACTTCTTC    |
| cg1918-fw | ATAAGCATCAGAGCCATGCTCG    |
| cg1918-rv | GTTGCGGGTGAGGGTCTGA       |
| cg3138-fw | GCAGTCGATGAGAACAGGAATC    |
| cg3138-rv | TCCAGGAGTGCGCTTCTTA       |
| cg1290-fw | AACCACACGTCACCGCGTTGC     |
| cg1290-rv | AGCGACAGTGGAAGAAAAGTTGG   |
| cg2061-fw | AGCTTGATGATGTAGAAGCGAAAAG |
| cg2061-rv | GACGCCTGCAGCCTTGGGA       |
| cg0936-fw | CCGGAAGTTACATCGCTACC      |
| cg0936-rv | GGAGCTAGTCTTAGTGGAGTG     |
| cg3107-fw | CTATCTAGTAGGTACGGCGC      |
| cg3107-rv | GGTAAATTCTTGGGGTGCAGC     |
| cg3286-fw | CGGTGTGCGGTCAGCCAT        |
| cg3286-rv | CGTGAGGGCGAGGGTAAG        |
| cg1580-fw | GCTTGTGGCGACTCTGAG        |
| cg1580-rv | CATAGTTACACCATACAGTTATGC  |
| cg0753-fw | ACCAAGCAGACAAGCTAGTACAG   |

|           |                            |
|-----------|----------------------------|
| cg0753-rv | GTGGTAGCAAAAGCGCCAG        |
| cg1476-fw | GCTCTAACAACCGCCAAAAGAAGAAC |
| cg1476-rv | CGGGTGGATCTCATTTTGGG       |
| cg0998-fw | TGATTGGAAACTGCTGGGC        |
| cg0998-rv | CGGGTTCTCACCGTTGTTTG       |
| cg2906-fw | GCTGCGATTGCTGCAACAG        |
| cg2906-rv | GGACGAGTGTCCGTGATTTTG      |
| cg2909-fw | CGTGAAATGACAGATTCCACC      |
| cg2909-rv | GTCTTGGCGATTTCTCAATAGTC    |

**PCR products and oligonucleotides used for the determination of the *lpsA* binding sites in the cg3323 promoter**

|                  |                                       |
|------------------|---------------------------------------|
| cg3323-3         | GAATGGTATGTCCGTACCCTG                 |
| cg3323-4         | CAGGGTACGGACATACCATTG                 |
| cg3323-5         | CGTTCCAAAATGTGGGGATTCC                |
| cg3323-6         | GGAATCCCCACATTTTGAACG                 |
| cg3323-7         | CATTACCCCCATTCCGGGAGTG                |
| cg3323-8         | CACTCCCGAATGGGGTAATG                  |
| cg3323-30er-A-fw | AATGGGGTAATGCTTGATCGATCAATTGA         |
| cg3323-30er-A-rv | TCAATTGATCGATCAAGCATTACCCCCATT        |
| cg3323-30er-B-fw | TGCTTGATCGATCAATTGAGTTGCTTGATCGATCAGG |
| cg3323-30er-B-rv | CCTGATCGATCAAGCAACTCAATTGATCGATCAAGCA |
| cg3323-30er-C-fw | GTTGCTTGATCGATCAGGTCTGATTTCTGC        |
| cg3323-30er-C-rv | GCAGAAATCAGACCTGATCGATCAAGCAAC        |
| cg3323-30er-D-fw | AGGTCTGATTTCTGCTGGGAATCCCCACAT        |
| cg3323-30er-D-rv | ATGTGGGGATTCCCAGCAGAAATCAGACCT        |

**PCR products and oligonucleotides used for the determination of the *lpsA* binding site in the cg0044 promoter**

|                  |                                 |
|------------------|---------------------------------|
| cg0044-3         | GTGGTTCCTTGGTTGCGTTG            |
| cg0044-4         | CAACGCAACCAAGGAACCAC            |
| cg0044-5         | CACAGCGCAAAGCCACTGAATC          |
| cg0044-6         | GATTCAGTGGCTTTGCGCTGTG          |
| cg0044-7         | GCAGATCAGATTATCGCCTTGGA         |
| cg0044-8         | ACGATCTTGATCAAGCACATCAAGC       |
| cg0044-9         | GCTTGATGTGCTTGATCAAGATCGT       |
| cg0044-10        | CAAGTCAACGCAGGTCAGAG            |
| cg0044-11        | CTCTGACCTGCGTTGACTTG            |
| cg0044-30er-E-fw | AGCCACTGAATCAATAAAGAAGCGTTAATA  |
| cg0044-30er-E-rv | TATTAACGCTTCTTTATTGATTCAGTGGCT  |
| cg0044-30er-F-fw | AAAGAAGCGTTAATAAAGTTTGACTTGTGC  |
| cg0044-30er-F-rv | GCACAAGTCAAACCTTTATTAACGCTTCTTT |
| cg0044-30er-G-fw | AAGTTTGACTTGTGCCTCTGACCTGCGTTG  |
| cg0044-30er-G-rv | CAACGCAGGTCAGAGGCACAAGTCAAACCTT |

**PCR products and oligonucleotides used for the investigation of putative *lpsA* binding sites in other promoters**

|          |                       |
|----------|-----------------------|
| cg3195-3 | GATGGATCCTGTGGTTGAACC |
| cg3195-4 | GGTTCAACCACAGGATCCATC |
| cg2896-3 | CTAGTAAGCAACCCACCAAGC |

|                  |                                |
|------------------|--------------------------------|
| cg2896-4         | GCTTGGTGGGTTGCTTACTAG          |
| cg3195-5         | AATCTGTGCACCGTGGGTAC           |
| cg3195-6         | GTACCCACGGTGCACAGATT           |
| cg3195-7         | CCGTTTGTAAATCTTGCAAAGTGGG      |
| cg3195-8         | CCCACCTTGCAAGAATTACAAACGG      |
| cg3389-3         | CAATGCTCAGAGGGGTTACC           |
| cg3389-4         | GGTAACCCCTCTGAGCATTG           |
| cg3210-30er-fw   | GCTCACTTCTTGATTGATGCGGTGGCTTTT |
| cg3210-30er-rv   | AAAAGCCACCGCATCAATCAAGAAGTGAGC |
| cg3195-30er-A-fw | TTCAACCACAGGATCCATCCAGTTTTCCGT |
| cg3195-30er-A-rv | ACGAAAACCTGGATGGATCCTGTGGTTGAA |
| cg1421-3         | GACTTTTAGCAGCTCAACGGC          |
| cg1421-4         | GCCGTTGAGCTGCTAAAAGTC          |
| cg0534-3         | CTCGATTGCCAGGGTTCCAAC          |
| cg0534-4         | GTTGGAACCCTGGCAATCGAG          |
| cg1918-3         | CTACTGCGTCGTGTCCAC             |
| cg1918-4         | GTGGACACGACGCAGTAG             |
| cg1918-30er-fw   | TTTAATGACTTTAGCTATACTTCTATCTTG |
| cg1918-30er-rv   | CAAGATAGAAGTATAGCTAAAGTCATTA   |
| cg0534-30er-fw   | CATTCTAGCTTTAGTGACCATGTCAACTAC |
| cg0534-30er-rv   | GTAGTTGACATGGTCACTAAAGCTAGAATG |
| cg1421-30er-A-fw | ACTAATTACTTGACACGTCAAGTAATTAGG |
| cg1421-30er-A-rv | CCTAATTACTTGACGTGTCAAGTAATTAGT |
| cg1421-30er-B-fw | GTTGTGTTTCATGATCAAAGAAGTGTCAAC |
| cg1421-30er-B-rv | GTTGAGCAGTTCTTTGATCATGAACACAAC |
| cg3195-30er-B-fw | CCAATTCATTCGATAGATCCTCGAAAAAG  |
| cg3195-30er-B-rv | CTTTTTGCGAGGATCTATCGAATGAATTGG |
| cg0534-30er-B-fw | GCTGAGCTGCTTCCAGATCCAGTTTCTGAG |
| cg0534-30er-B-rv | CTCAGAACTGGATCTGGAAGCAGCTCAGC  |
| cg0534-30er-C-fw | TTATCAAACCTTCCCGGCTGAGCTGCTTCC |
| cg0534-30er-C-rv | GGAAGCAGCTCAGCCGGGAAAGTTTGATAA |
| cg0534-30er-D-fw | CCCCAATAGTTGACACGGAACTAATTCAT  |
| cg0534-30er-D-rv | ATGAATTAGTTTCCGTGTCAACTATTGGGG |

**Oligonucleotides for the mutational analysis of the DNA binding site in the cg3323 promoter**

|              |                                          |
|--------------|------------------------------------------|
| cg3323-WT-fw | TTGAGTTGCTTGATCGATCAGGTCTGATTT           |
| cg3323-WT-rv | AAATCAGACCTGATCGATCAAGCAACTCAA           |
| cg3323-M1-fw | TTGAGT <b>GTA</b> TTGATCGATCAGGTCTGATTT  |
| cg3323-M1-rv | AAATCAGACCTGATCGATCAAT <b>ACT</b> ACTCAA |
| cg3323-M2-fw | TTGAGTTG <b>GGT</b> ATCGATCAGGTCTGATTT   |
| cg3323-M2-rv | AAATCAGACCTGATCGAT <b>ACCG</b> CAACTCAA  |
| cg3323-M3-fw | TTGAGTTGCTT <b>GCGA</b> GATCAGGTCTGATTT  |
| cg3323-M3-rv | AAATCAGACCTGAT <b>TCGC</b> CAAGCAACTCAA  |
| cg3323-M4-fw | TTGAGTTGCTT <b>TGCG</b> AGGTCTGATTT      |
| cg3323-M4-rv | AAATCAGACCT <b>GCGA</b> GATCAAGCAACTCAA  |
| cg3323-M5-fw | TTGAGTTGCTT <b>ACT</b> GTCTGATTT         |
| cg3323-M5-rv | AAATCAGAC <b>AGT</b> ATCGATCAAGCAACTCAA  |
| cg3323-M6-fw | TTGAGTTGCTT <b>GAT</b> GTCTGATTT         |
| cg3323-M6-rv | AAATCA <b>TCA</b> CTGATCGATCAAGCAACTCAA  |

**PCR products and oligonucleotides used for the determination of the IpsA binding site in promoters of genes of *C. diphtheriae* and *M. tuberculosis***



|                   |                                 |
|-------------------|---------------------------------|
| Rv0046c-P-fw      | AACGCCGGGAAGGCTTGC              |
| Rv0046c-P-rv      | GGTAACGACTGGTGCTCACTCAT         |
| DIP-0115-P-fw     | CCTCAAAGTGGGGAGGCTT             |
| DIP-0115-P-rv     | GGCAACACGAATAGCAGACAC           |
| DIP0115-30er-A-fw | TTTTGTAGCTGCATGATCCATCTGTACCGA  |
| DIP0115-30er-A-rv | TGGGTACAGATGGATCATGCAGCTACAAAA  |
| DIP0115-30er-B-fw | ATTTACTTAACCGATTAACCAGCAGTTTTA  |
| DIP0115-30er-B-rv | TAAAAGTCTGGTTAATCGGTTAAGTAAAT   |
| DIP0021-30er-A-fw | TGGGTCAACTTGATCAAGCAATTTCTCTTC  |
| DIP0021-30er-A-rv | GAAGAGAAATTGCTTGATCAAGTTGACCCA  |
| DIP0021-30er-B-fw | AACCCCACTGAATCGGTAAAGATGCAGGTC  |
| DIP0021-30er-B-rv | GACCTGCATCTTTACCGATTCAAGTGGGGTT |
| rv0483-30er-fw    | GTGCGCGATGGGGTCCATGATGTGTTTGGT  |
| rv0483-30er-rv    | ACCAAACACATCATGGACCCCATCGCGCAC  |
| Rv0047-A-fw       | GAGCAAATTCGATGCGAAGACC          |
| Rv0047-A-rv       | ATTTGCGACAACATCACCGCGTC         |
| Rv0047-B-fw       | GTTGTCGTTGTCGTTGTATGTCTC        |
| Rv0047-B-rv       | TAGCCATGCATCGGTGACTC            |
| Rv0047-30er-A-fw  | CGCAGGTGACGGCACCATCAAGCACGTCAG  |
| Rv0047-30er-A-rv  | CTGACGTGCTTGATGGTGCCGTCACCTGCG  |
| Rv0047-30er-B-fw  | TGTCGCAAATATATCGAGGCGATACGATGA  |
| Rv0047-30er-B-rv  | TCATCGTATCGCCTCGATATATTTGCGACA  |
| Rv0047-30er-C-fw  | AAAAGGAGGTGACTCGATGCTGGAGCTCGC  |
| Rv0047-30er-C-rv  | GCGAGCTCCAGCATCGAGTCACCTCCTTTT  |
| Rv0047-30er-D-fw  | CTGGGTCTGTTGATCGAGTCACCGATGCAT  |
| Rv0047-30er-D-rv  | ATGCATCGGTGACTCGATCAACAGACCCAG  |

**PCR products for the control EMSA with AcnR**

|                |                         |
|----------------|-------------------------|
| acn-Prom-5-for | ACATCACGCACGTACCCATTTGG |
| acn-Prom-3-rev | TAGTCATAGGACTTGTCGCC    |

<sup>a</sup>In some cases oligonucleotides were designed to introduce recognition sites for restriction endonucleases (recognition sites underlined). Complementary sequences used for overlap extension PCR are written in bold letters. Red letters indicate mutated bases.

**Table S3:** Genes more than four-fold regulated in the *IpsA*-deletion mutant compared to the wild type. Genes which are part of the *DtxR/RipA*-regulon or encoding ribosomal proteins are shaded in grey. \* Target gene of *IpsA* which was identified by a genome-wide *in silico* search with the binding motif and does not fit into the criteria stated above. Array data were deposited in the GEO database ([ncbi.nlm.nih.gov/geo](http://ncbi.nlm.nih.gov/geo)) under accession number GSE50210.

| Locus tag | Gene         | Annotated function                                                                              | Ratio  | n | p-value |
|-----------|--------------|-------------------------------------------------------------------------------------------------|--------|---|---------|
| cg3323    | <i>ino1</i>  | myo-inositol-phosphate synthase                                                                 | 0.047  | 3 | 0.011   |
| cg0044    | <i>rbsB</i>  | ABC transporter/periplasmic D-ribose-binding protein                                            | 0.082  | 3 | 0.004   |
| cg2896    |              | putative secreted protein, hypothetical endoglucanase                                           | 0.114  | 3 | 0.003   |
| cg2181    |              | ABC-type peptide transport system, secreted component                                           | 0.128  | 3 | 0.005   |
| cg0446    | <i>sdhA</i>  | succinate dehydrogenase                                                                         | 0.138  | 3 | 0.003   |
| cg0045    |              | probable ABC transport protein, membrane component                                              | 0.138  | 3 | 0.028   |
| cg2636    | <i>catA1</i> | catechol 1,2-dioxygenase                                                                        | 0.143  | 3 | 0.003   |
| cg0622    |              | duplicated ATPase component SCO2324 of energizing module of predicted cobalamin ECF transporter | 0.160  | 3 | 0.003   |
| cg2182    |              | ABC-type peptide transport system, permease component                                           | 0.167  | 3 | 0.022   |
| cg1918    |              | putative secreted protein                                                                       | 0.169  | 3 | 0.005   |
| cg3138    | <i>ppmA</i>  | putative membrane-bound protease modulator                                                      | 0.171  | 3 | 0.004   |
| cg2910    | <i>ipsA</i>  | transcriptional regulator, <i>Lacl</i> family                                                   | 0.173  | 3 | 0.030   |
| cg3195    |              | flavin-containing monooxygenase (FMO)                                                           | 0.178  | 3 | 0.010   |
| cg0447    | <i>sdhB</i>  | succinate dehydrogenase                                                                         | 0.185  | 3 | 0.002   |
| cg0621    |              | substrate-specific component SCO2325 of predicted cobalamin ECF transporter                     | 0.187  | 3 | 0.006   |
| cg0445    | <i>sdhC</i>  | succinate dehydrogenase                                                                         | 0.189  | 3 | 0.005   |
| cg0623    |              | transmembrane component SCO2323 of energizing module of predicted cobalamin ECF transporter     | 0.194  | 3 | 0.004   |
| cg3048    | <i>pta</i>   | phosphate acetyltransferase                                                                     | 0.202  | 2 | 0.082   |
| cg0601    | <i>rpsC</i>  | 30S ribosomal protein S3                                                                        | 0.212  | 3 | 0.007   |
| cg3139    |              | hypothetical protein cg3139                                                                     | 0.213  | 3 | 0.002   |
| cg0599    | <i>rpsS</i>  | 30S ribosomal protein S19                                                                       | 0.215  | 3 | 0.009   |
| cg0600    | <i>rplV</i>  | 50S ribosomal protein L22                                                                       | 0.216  | 3 | 0.007   |
| cg0598    | <i>rplB</i>  | 50S ribosomal protein L2                                                                        | 0.217  | 3 | 0.011   |
| cg1487    | <i>leuC</i>  | isopropylmalate isomerase large subunit                                                         | 0.218  | 3 | 0.035   |
| cg0624    |              | secreted oxidoreductase                                                                         | 0.219  | 3 | 0.005   |
| cg0602    | <i>rplP</i>  | 50S ribosomal protein L16                                                                       | 0.226  | 3 | 0.005   |
| cg1290    | <i>metE</i>  | 5-methyltetrahydropteroyltrimethylglutamate-homocysteine methyltransferase                      | 0.226  | 3 | 0.017   |
| cg0594    | <i>rplC</i>  | 50S ribosomal protein L3                                                                        | 0.233  | 2 | 0.085   |
| cg0593    | <i>rpsJ</i>  | 30S ribosomal protein S10                                                                       | 0.237  | 2 | 0.064   |
| cg2061    | <i>psp3</i>  | putative secreted protein                                                                       | 0.244  | 3 | 0.000   |
| cg0936    | <i>rpf1</i>  | resuscitation promoting factor                                                                  | 0.247  | 2 | 0.098   |
| cg3107    | <i>adhA</i>  | Zn-dependent alcohol dehydrogenase                                                              | 0.251  | 3 | 0.033   |
| cg3210*   |              | cell envelope-related transcriptional regulator                                                 | 0,411  | 2 | 0,024   |
| cg2870    | <i>dctA</i>  | Na <sup>+</sup> /H <sup>+</sup> -dicarboxylate symporter                                        | 3.948  | 3 | 0.004   |
| cg3286    |              | putative secreted protein                                                                       | 4.073  | 2 | 0.013   |
| cg0527    | <i>glyR</i>  | transcriptional regulator of <i>glyA</i>                                                        | 4.578  | 2 | 0.021   |
| cg1580    | <i>argC</i>  | N-acetyl-gamma-glutamyl-phosphate reductase                                                     | 4.798  | 3 | 0.003   |
| cg3391    | <i>oxiD</i>  | myo-Inositol dehydrogenase                                                                      | 4.979  | 3 | 0.018   |
| cg1421    |              | putative dinucleotide-binding enzyme                                                            | 5.214  | 3 | 0.000   |
| cg0533    | <i>menE</i>  | O-succinylbenzoic acid-CoA ligase                                                               | 5.467  | 3 | 0.001   |
| cg0753    |              | secreted protein                                                                                | 5.507  | 3 | 0.000   |
| cg2797    |              | hypothetical protein cg2797                                                                     | 5.517  | 3 | 0.023   |
| cg3389    | <i>oxiC</i>  | myo-Inositol dehydrogenase                                                                      | 5.528  | 3 | 0.006   |
| cg0471    | <i>htaC</i>  | secreted heme transport-associated protein                                                      | 5.553  | 3 | 0.003   |
| cg1476    | <i>thiC</i>  | thiamine biosynthesis protein ThiC                                                              | 5.554  | 3 | 0.000   |
| cg0534    |              | putative integral membrane protein                                                              | 5.597  | 3 | 0.000   |
| cg0998    |              | trypsin-like serine protease                                                                    | 5.798  | 3 | 0.001   |
| cg2311    |              | SAM-dependent methyltransferase                                                                 | 6.217  | 2 | 0.032   |
| cg1120    | <i>ripA</i>  | transcriptional regulator of iron proteins, <i>AraC</i> family                                  | 6.983  | 3 | 0.005   |
| cg3390    |              | myo-Inositol catabolism, sugar phosphate isomerase/epimerase                                    | 7.674  | 3 | 0.012   |
| cg0470    | <i>htaA</i>  | secreted heme transport-associated protein                                                      | 8.972  | 3 | 0.008   |
| cg3156    | <i>htaD</i>  | secreted heme transport-associated protein                                                      | 9.695  | 3 | 0.002   |
| cg2796    |              | MMGE/PRPD family protein                                                                        | 11.215 | 3 | 0.021   |

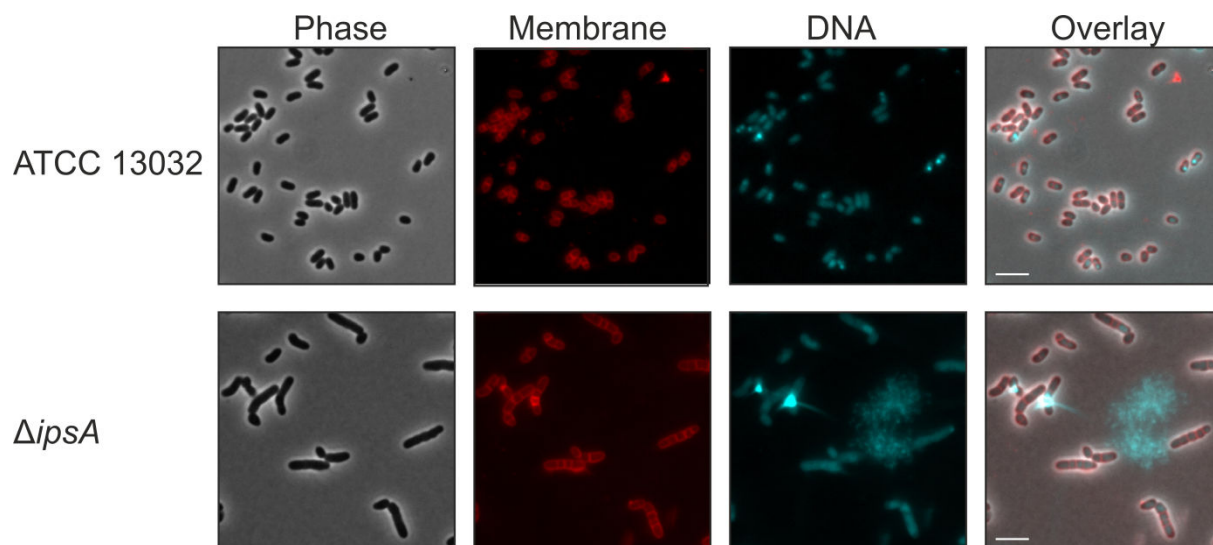

**Fig. S1: Microscopic phenotype of ATCC 13032 and  $\Delta$ *IpsA*.** DNA was stained with DAPI (cyan) and lipophilic regions with Nile red (red), scale bar 5  $\mu$ m. The cells fail to divide properly, the DNA distribution is sometimes uneven and DNA can regularly be seen outside of the cells.

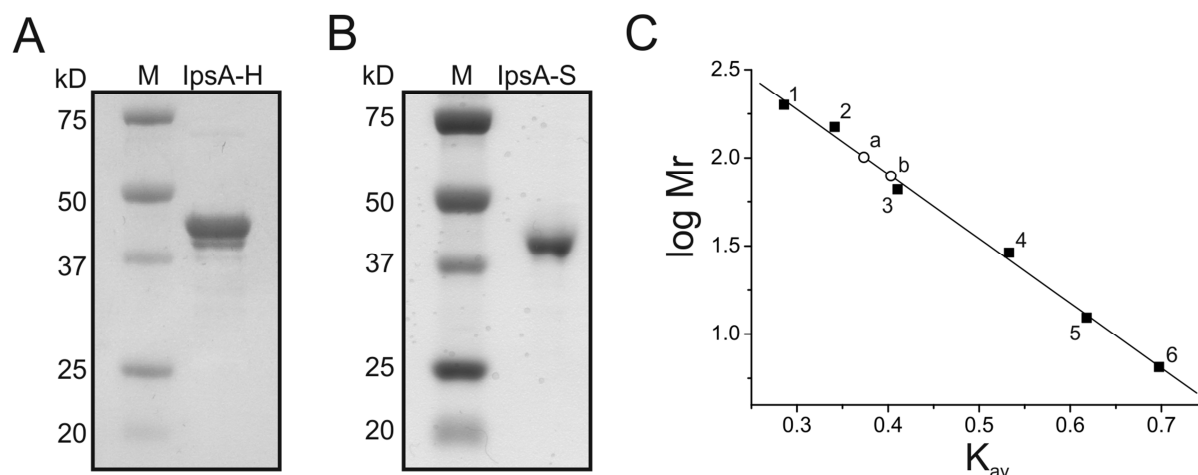

**Fig. S2: Purification and determination of the molecular weight of IpsA.** (A) Coomassie stained SDS-PAGE of IpsA-N-His. (B) Coomassie stained SDS-PAGE of IpsA-C-Strep. (C) Size exclusion chromatography of IpsA after purification of the His-tagged (a) or STREP-tagged (b) derivative using a Superdex 200 10/300 GL column. The standards for molecular weight determination were (1)  $\beta$ -amylase (200 kDa), (2) alcohol dehydrogenase (150 kDa), (3) bovine serum albumin (66 kDa), (4) carbonic anhydrase (29 kDa), (5) cytochrome C (12.4 kDa) and (6) aprotinin. IpsA eluted at a theoretical molecular weight of (a) 101 kDa or (b) 79 kDa. Gel filtration revealed less aggregated protein in the Strep-tag preparation.

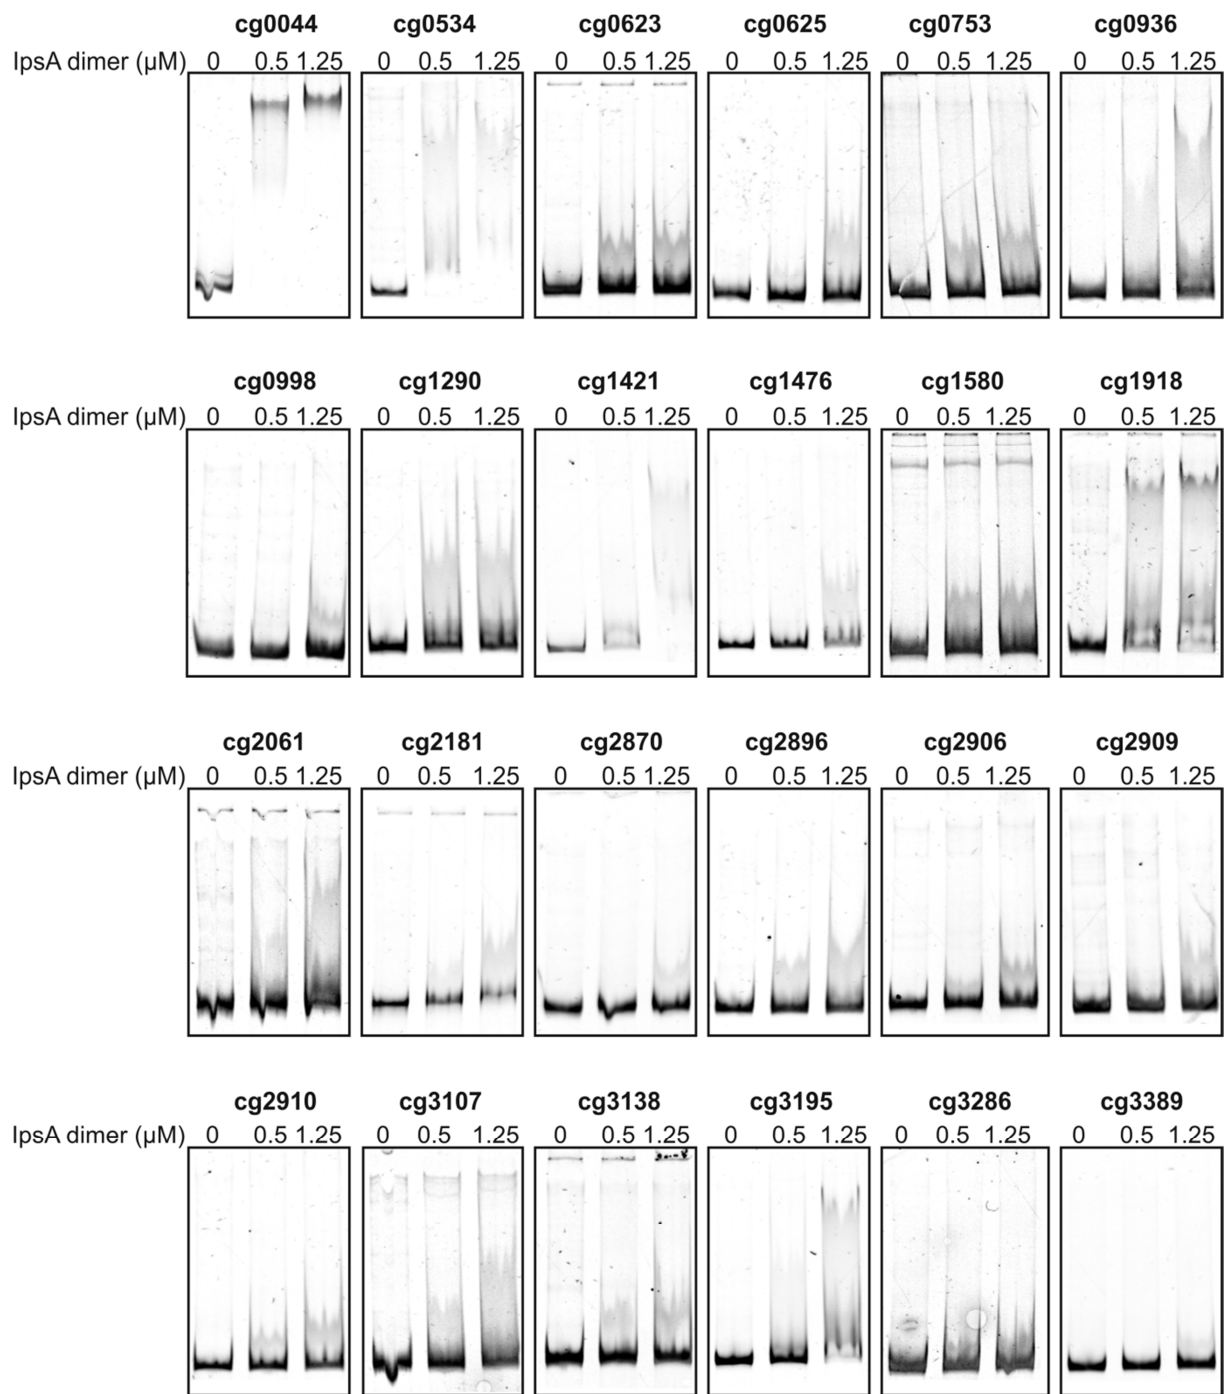

**Fig. S3: Binding studies with promoter regions of putative target genes.** DNA fragments of about 500 bp (90 ng) covering the respective promoter regions were incubated with IpsA-His at the given concentrations and analyzed on 10 % native polyacrylamide gels. Gels were stained with SYBR Green.

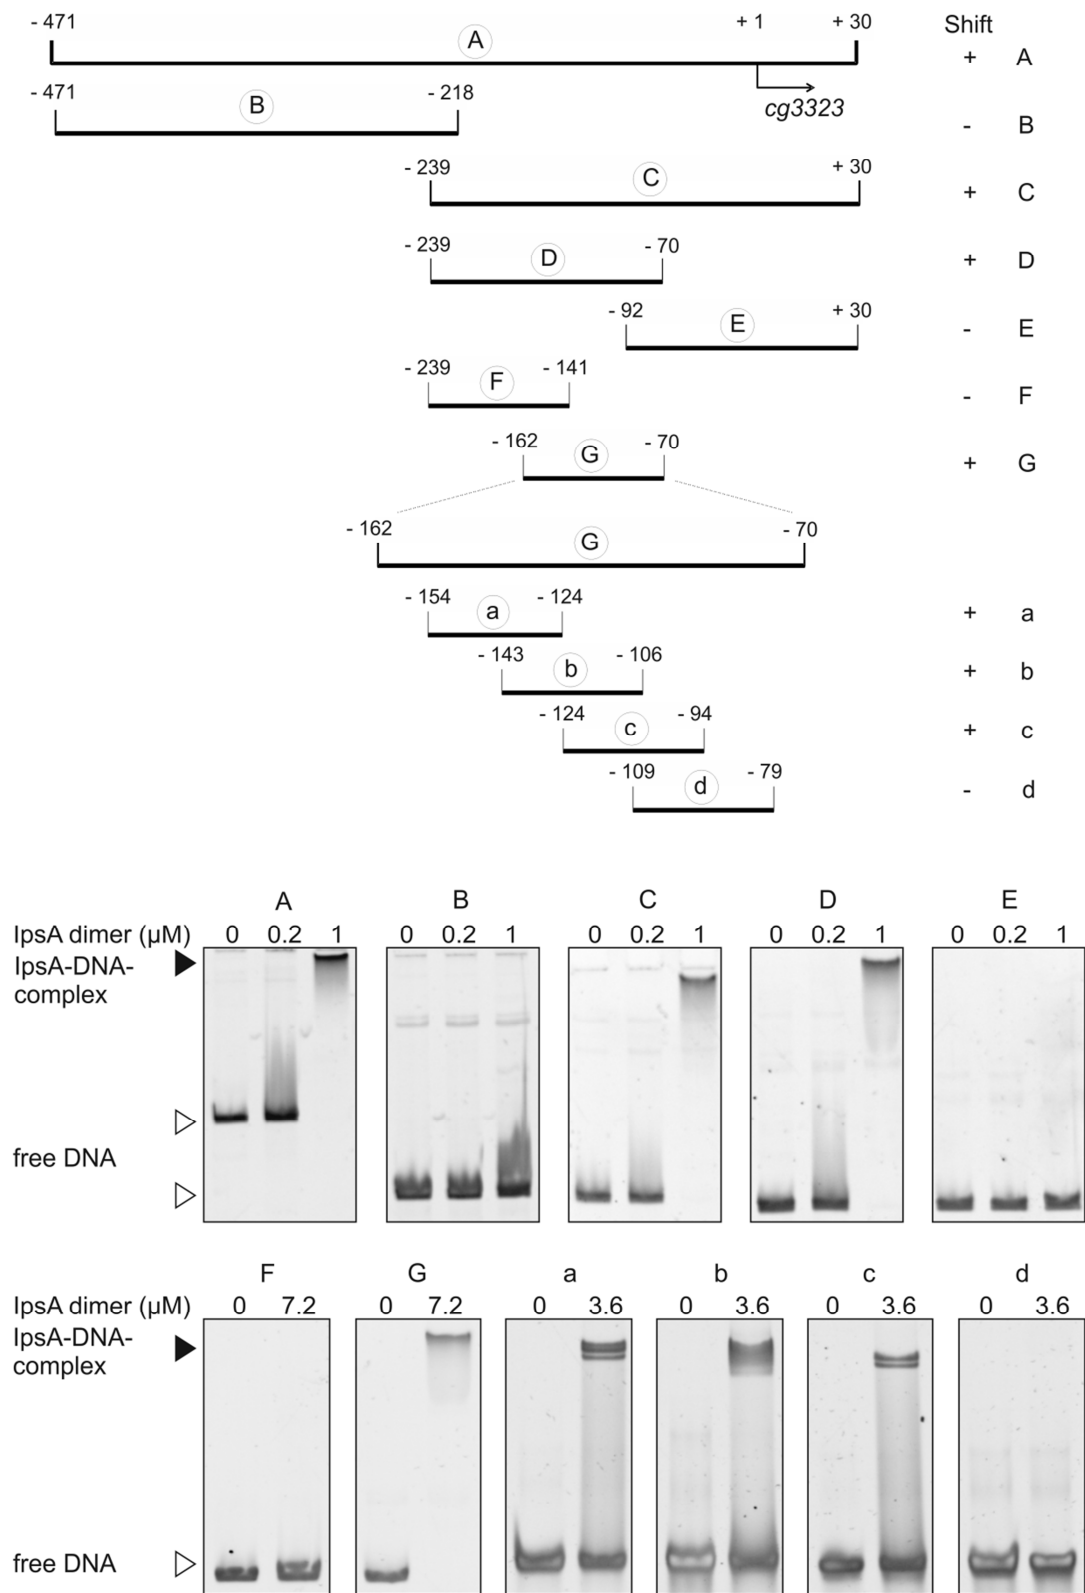

**Fig. S4: Identification of the IpsA binding site in the *ino1* promoter.** Several subfragments of the original 500 bp fragment were designed and tested in band shift assays for IpsA-His binding. Positions are given relative to the translational start of *ino1* (*cg3323*).

**cg3323** GGGGTAATGCTTGATCGATCAATTGAGTTGCTTGATCGATCAGGTCTGATTTCTGC  
TGGGAATCCCCACATTTTGGAAACGTAGCGTCGATAAGCGTGCGG-50-bp-ATG  
-35 -10 +1

**cg0044** AGCCACTGAATCAATAAAGAAGCGTTAATAAAGTTTGACTTGTGCCTCTGACCTGCGTTTGACTTGAGTAAATG  
-35 -10 +1

**cg1421** TTTCTTTTAACTAATTACTTGACACGTC AAGTAATTAGGGTC TAGTGT TGTGTTCA-95-bp-ATG  
-35 -10 +1

**cg3195** GGTTC AACCACAGGATCCATCCAGT TTTCCGTCATAGGGGGTACTTTCC-90-bp-  
ATGACTTGAAACACTTTTATAGAGTAGAAA GTGAGTCA-24-bp-TTG  
-35 -10 +1

**cg3210** TAATCGCTCACTTCTTGATTGATGCGGTGGCTTTTGTGGGCTACTCCGC-94-bp-  
AATACA TCTGTCCCTCCTAGGCGCTACTCTATTAACCATG  
-35 -10 +1

**cg0534** CTCCGACGAAACCCCAATAGTTGACACGGAACTAATTCATTC TAGCTTTAGTGACCATGTCA  
-35 -10 +1

**Fig. S5: Promoter regions of the IpsA target genes in *C. glutamicum*.** Transcriptional start sites (red) and IpsA binding sites (blue) are given.

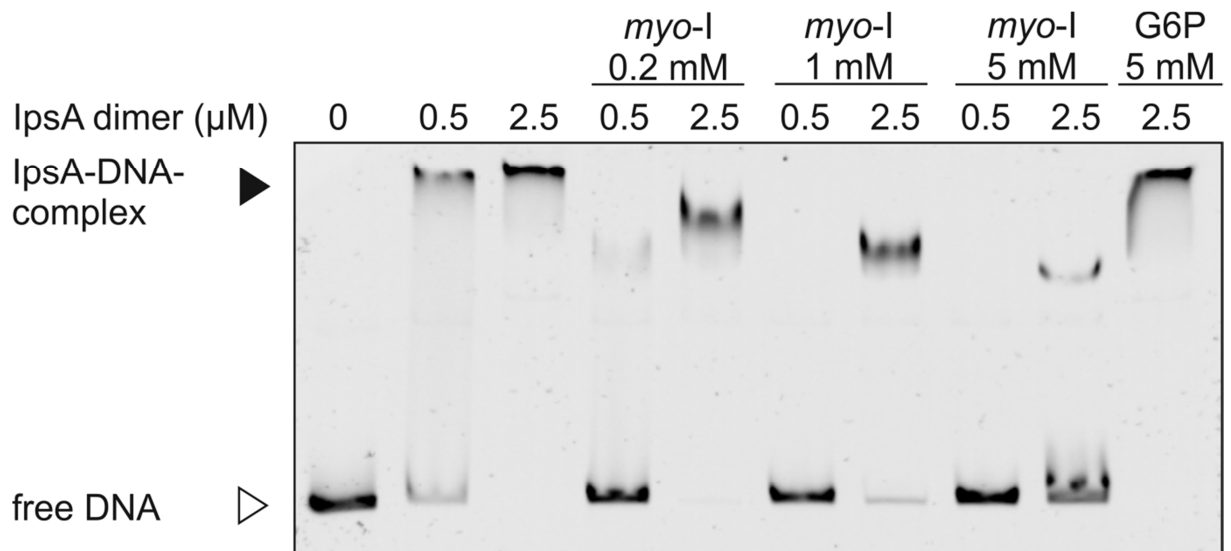

**Fig. S6: Inhibition of the IpsA-DNA interaction by *myo*-inositol.** A DNA fragment (169 bp) covering the promoter region of *ino1* was incubated with IpsA and *myo*-I or G6P at concentrations as indicated. *myo*-I, *myo*-inositol; G6P, glucose-6-phosphate.

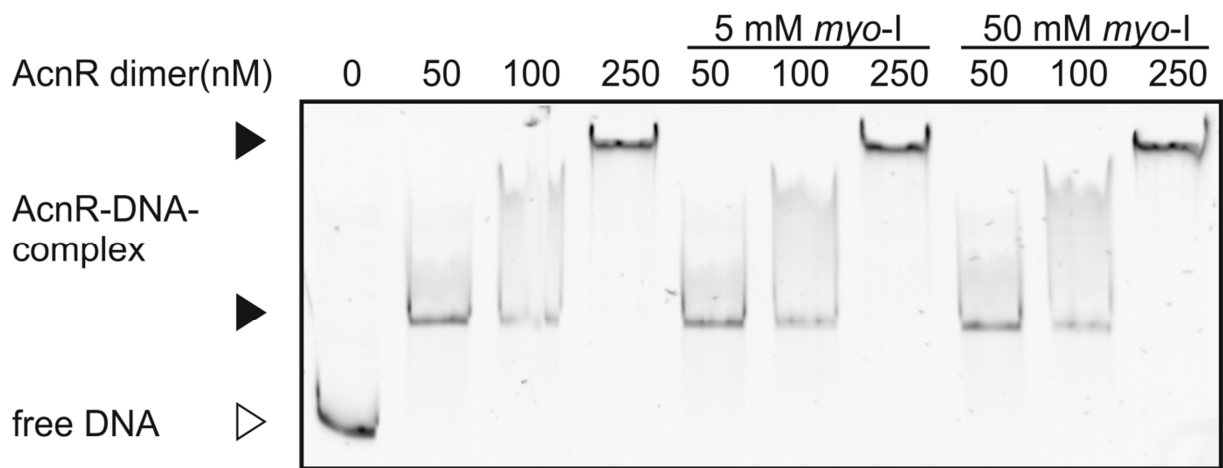

**Fig. S7: Bandshift with AcnR and *myo*-Inositol.** 90 ng of a 343 bp DNA fragment covering the promoter of aconitase (*acn*, cg1737) of *C. glutamicum* was incubated with AcnR protein and different concentrations of *myo*-inositol and analyzed on a 10 % native polyacrylamide gel. In the tested concentrations, *myo*-Inositol has no influence on the formation of the AcnR-DNA-complex.

```

cgb_cg0044      -TCGAAGATGTC--ATTAACCAA--CAACGCAACCAAGGAACCACAATTATTCTTGCAC 55
cdi_DIP0021     TTCATGATAGGCGGAATAGCAGTGCCAGCAGTGCCACTGGGTCA-ACTTGATCAAGCAAT 59
                **.....* * *:*:***.:.: **.*. :.***. *.. ** *.***:***:*. *

cgb_cg0044      T-CACGATCTTGATCAAGCACATCAAGCAGATCAGATTATCGCCTTGAAAAAGGAATCA 114
cdi_DIP0021     TTCTTCTTCCCTTGCTATGGTGAG--CTGCCGCTACATTGCACCCCCAG--ATGGGGGAGGA 115
                * *:* : ***.*.:. * .. .:***.*.:.: * :.* ** :* *:.***.* *

cgb_cg0044      TAAAGCCACAGCGCAAAGCCACTGAATCAATAAAGAAGCGTTAATAAAGTTTACTT-GT 173
cdi_DIP0021     ATCTGTCCCAGCTCAACCCCACTGAATCGGTAAGATGCAGGTCAGCGGTTTGACCTCAA 175
                :.:. * *.*** * ** . ***** ..*****:*. :.:.***** * .:

cgb_cg0044      GCCTCTGAC-CTGCGTTG-ACCTGAGTAAATGAAGCTACCAAGACTC----GCCGCAGC 226
cdi_DIP0021     GCCGTTGATGCGACACCATGCTTGAGTGAAAAGTATAAAGAAGACCCCTCAAAGCCGCCGC 235
                *** ** * .*. . .*****.***:..: .:*. ***** * *****.*

cgb_cg0044      GCTCATTGGTGCTGCGCT-GTTAAT--CACGGGTTGTTACAGCTACCGGGGAGCACCAG 283
cdi_DIP0021     AGCCGCTGTGGCAGCCCTTGTACTGTACCGCATGTTCCGCTACTGGCGGTGCCCCGAG 295
                . * . ** **.* ** ** * ** * .*****.***** ** **:*.*.*.*

cgb_cg0044      GGCAACAGATGGGGCAT 300
cdi_DIP0021     GGCTT----- 300
                ***:

cgb_cg3323      -CACCTACTTTGTTTTTC-CCCTAGAAATCCCCCAT--TTCATCACTCCCGAATGGGGGTA 56
cdi_DIP0115     TTAGCAGTAATTTTCTCGCCCTTTTGTAGCTGCATGATCCATCTGTACCGATTTACTTAA 60
                * *:. :.* ** ** ***: :.:. * ** * ***: *.***:* . :*

cgb_cg3323      ATGCTTGATCGATCAATTGAGTTGCTTGATCGATCAGGTCTGATTTCTG-CTGGGAATCC 115
cdi_DIP0115     CCGATT-AACCAGCAGTTTTAATGCTC--CACACCGG-CGGTATAGTGGCCGAGATCCA 115
                . *.** *:* * **.*. :.***** *..*.* ** * *:*: * * *.*.*: *

cgb_cg3323      CCACATTTTGGAACTGAGCTGCGATAAGCGTGCAGCGAAGCTTTTTTCGGTCGCGCCGTT 175
cdi_DIP0115     CGACA-----GCACCTACC--CG-TGGGCTCCCCCGCAGTGGGTACG-TCGTGAAGCTT 166
                * ** * .** ** * ** *.* ** * * **.* *:* ** ** *.. **

cgb_cg3323      ATCTTTTTAAGAGGAGAAATTTAG---ATGAGCACGTCCACCATCAGGGTTGCCATTGC 232
cdi_DIP0115     ATGTTCCGGTTGTTATCAAAGCCAAGGGAGTATGTGTGTCTGCTATTTCGTGTTGCCATTGC 226
                ** ** :*: .: ** :** .*: * . ** . * ** . * *****

cgb_cg3323      CGGAGTCGGAACTGCGCGACCTCCCTCATTCAGGGTGTGGAATATTACCGAAATGCGGA 292
cdi_DIP0115     CGGTGTGGGCACTGTGCATCGTCGCTGGTACAGGGCGTGGAGTATTACAAGGATGCGTC 286
                ***:* ** *.*** **.* * ** * .*:***** *****.*****.*****.

cgb_cg3323      TCCT--TCCG---- 300
cdi_DIP0115     CCCTGATCAGCAGG 300
                *** **.*

```

**Fig. S8: Alignments of the promoter regions of cg3323 and DIP0115 as well as cg0044 and DIP0021. red: translational start site, blue: IpsA binding sites.**



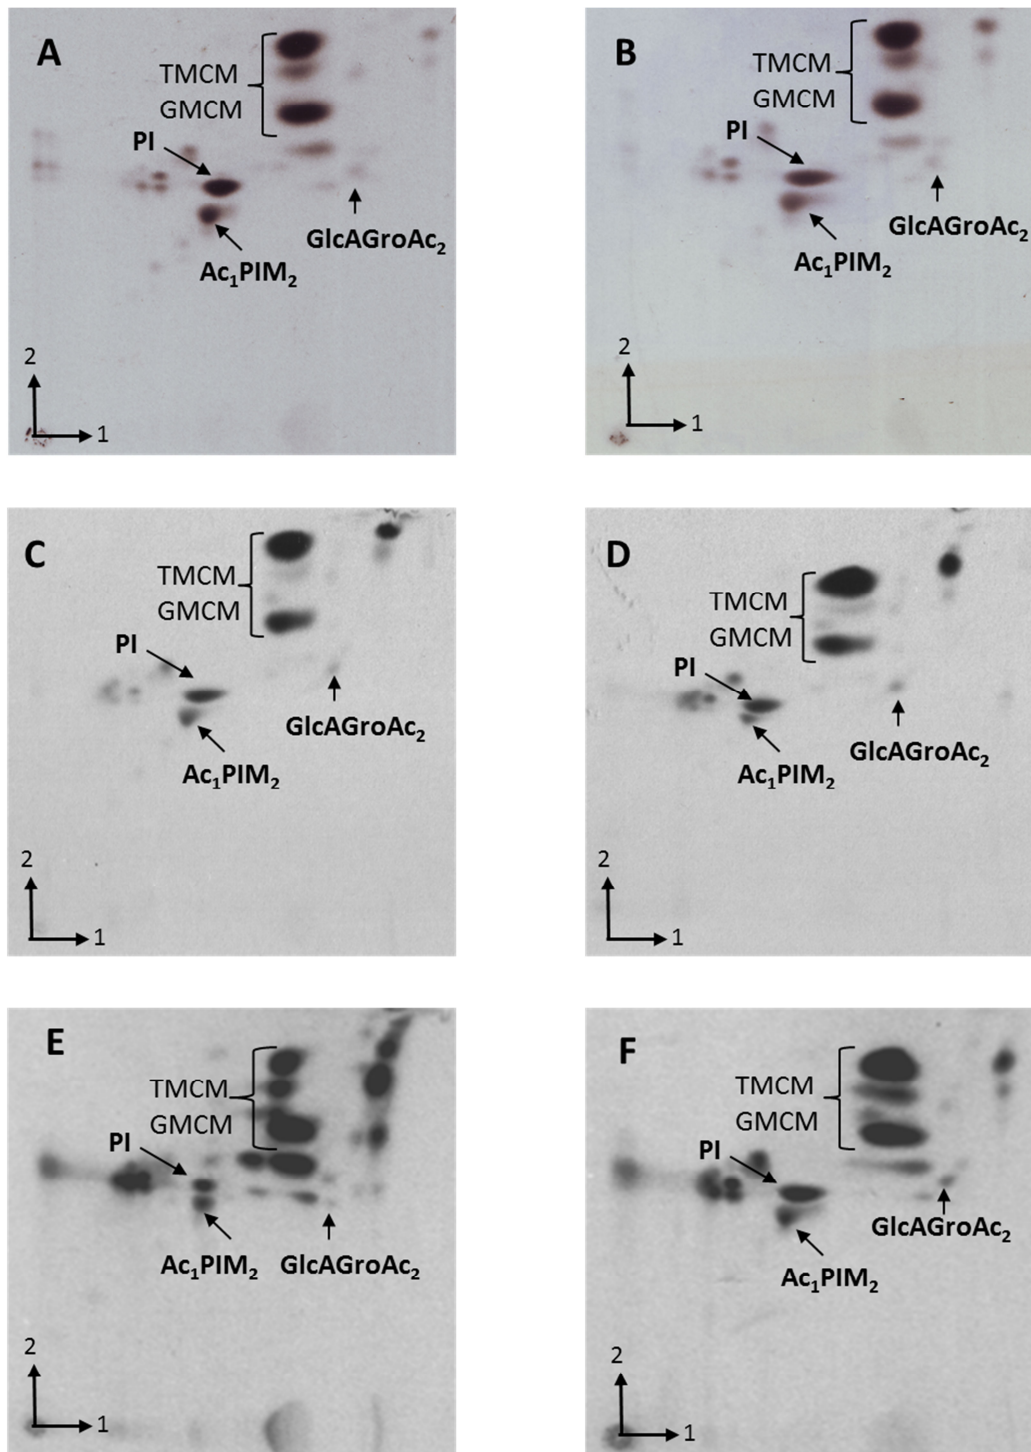

**Figure S9: 2D-TLC analysis of [ $^{14}\text{C}$ ]-labelled polar lipids from myo-inositol-grown cells.** (A) *C. glutamicum* ATCC 13032, (B) ATCC 13032  $\Delta ipsA$ , (C) ATCC 13032  $\Delta ipsA$  pAN6-cg3323, (D) ATCC 13032  $\Delta ipsA::pK18int-ipsA$ , (E) ATCC 13032  $\Delta ipsA$  pAN6-Rv3575 and (F) ATCC 13032  $\Delta ipsA$  pAN6-DIP1969, cultured in CGXII supplemented with 2% (w v $^{-1}$ ) inositol. The polar lipids extracts were loaded on silica gel 60 TLCs and developed in the solvent system:  $\text{CHCl}_3:\text{CH}_3\text{OH}:\text{H}_2\text{O}$  (60:30:6, v/v/v) in direction 1 and  $\text{CHCl}_3:\text{CH}_3\text{CO}_2\text{H}:\text{CH}_3\text{OH}:\text{H}_2\text{O}$  (40:25:3:6, v/v/v/v) in direction 2.
